# Supplementary material for: A super-Chandrasekhar mass type Ia supernova progenitor at 49 pc set to detonate in 23 Gyr
Source: Springer Nature journal article supplement (doi:10.1038/s41550-025-02528-4), 2025-04-04
Supplement: MOESM1 [file 41550_2025_2528_MOESM1_ESM.pdf]

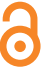

---

# **A super-Chandrasekhar mass type Ia supernova progenitor at 49 pc set to detonate in 23 Gyr**

---

In the format provided by the authors and unedited

---

## Supplementary Tables

**Table 1** A table of all observed radial velocities (without relativistic correction) and the mid-exposure time-stamps. Wavelength calibration errors were propagated. One-sigma error bars are given as the standard deviation of 1000 bootstrapping iterations.

| HJD–2450000<br>UTC | $RV_1$<br>[km s <sup>-1</sup> ] | $\Delta RV_1$<br>[km s <sup>-1</sup> ] | $RV_2$<br>[km s <sup>-1</sup> ] | $\Delta RV_2$<br>[km s <sup>-1</sup> ] | Instrument |
|--------------------|---------------------------------|----------------------------------------|---------------------------------|----------------------------------------|------------|
| 8588.734699        | -43.83                          | 10.22                                  | 128.60                          | 10.26                                  | ISIS       |
| 8588.739403        | -48.34                          | 13.12                                  | 126.60                          | 7.82                                   | ISIS       |
| 8591.687642        | -47.74                          | 4.63                                   | 137.97                          | 3.93                                   | ISIS       |
| 8591.698183        | -42.98                          | 5.32                                   | 139.73                          | 4.46                                   | ISIS       |
| 8591.745818        | -24.42                          | 4.93                                   | 117.45                          | 7.48                                   | ISIS       |
| 8591.752887        | -13.34                          | 3.91                                   | 113.95                          | 4.84                                   | ISIS       |
| 8645.660736        | -46.33                          | 4.10                                   | 139.79                          | 3.97                                   | ISIS       |
| 8645.670120        | -41.48                          | 4.08                                   | 139.02                          | 3.52                                   | ISIS       |
| 8731.364001        | 149.73                          | 9.28                                   | -27.17                          | 13.79                                  | IDS        |
| 8732.411857        | 95.08                           | 11.14                                  | 23.01                           | 11.46                                  | IDS        |
| 8732.432828        | 112.69                          | 14.73                                  | 13.43                           | 19.28                                  | IDS        |
| 8732.460152        | 146.81                          | 5.43                                   | -24.69                          | 8.03                                   | IDS        |
| 8732.481127        | 137.36                          | 9.86                                   | -21.20                          | 12.24                                  | IDS        |
| 8732.506595        | 139.55                          | 7.35                                   | -18.77                          | 3.99                                   | IDS        |
| 8733.496923        | -13.87                          | 9.40                                   | 110.97                          | 8.23                                   | IDS        |
| 8733.517893        | 13.12                           | 11.25                                  | 103.55                          | 11.63                                  | IDS        |
| 8734.382747        | 136.13                          | 10.99                                  | 1.58                            | 10.44                                  | IDS        |
| 8751.390254        | 124.27                          | 25.16                                  | 15.48                           | 35.06                                  | IDS        |
| 8751.400810        | 75.08                           | 31.95                                  | 39.30                           | 22.87                                  | IDS        |
| 8751.411366        | 111.57                          | 19.70                                  | 24.70                           | 35.63                                  | IDS        |
| 8751.421919        | 103.05                          | 36.85                                  | 13.66                           | 29.44                                  | IDS        |
| 10385.714514       | 121.92                          | 11.34                                  | -48.04                          | 5.86                                   | FIES       |
| 10389.693347       | 95.12                           | 3.91                                   | -14.90                          | 19.24                                  | FIES       |
| 10389.711256       | 100.95                          | 8.79                                   | -19.22                          | 14.96                                  | FIES       |
| 10401.639249       | 137.53                          | 4.08                                   | -30.59                          | 2.21                                   | FIES       |
| 10401.675067       | 137.67                          | 5.83                                   | -44.11                          | 3.54                                   | FIES       |
| 10401.692976       | 149.54                          | 12.12                                  | -50.05                          | 8.55                                   | FIES       |
| 10402.602016       | -40.56                          | 10.65                                  | 122.89                          | 4.08                                   | FIES       |
| 10403.596407       | 23.18                           | 18.31                                  | 56.32                           | 4.86                                   | FIES       |
| 10405.726945       | 119.48                          | 6.67                                   | -14.62                          | 6.83                                   | FIES       |
| 10412.657048       | -25.61                          | 7.60                                   | 146.64                          | 4.69                                   | FIES       |
| 10416.579027       | 123.96                          | 6.33                                   | -18.52                          | 6.26                                   | FIES       |
| 10426.543453       | 135.26                          | 12.18                                  | -39.47                          | 8.71                                   | IDS        |
| 10426.561527       | 155.21                          | 6.64                                   | -32.92                          | 5.31                                   | IDS        |
| 10426.579516       | 147.89                          | 8.65                                   | -51.49                          | 5.29                                   | IDS        |
| 10426.597579       | 150.34                          | 8.63                                   | -53.96                          | 7.91                                   | IDS        |
| 10426.615569       | 142.23                          | 8.13                                   | -36.32                          | 5.93                                   | IDS        |
| 10426.633728       | 141.73                          | 10.30                                  | -27.52                          | 5.79                                   | IDS        |
| 10426.651797       | 121.16                          | 10.04                                  | -22.66                          | 9.27                                   | IDS        |
| 10426.675840       | 104.72                          | 6.37                                   | 3.20                            | 4.94                                   | IDS        |
| 10426.693911       | 99.42                           | 18.86                                  | 10.39                           | 9.92                                   | IDS        |

| HJD-2450000<br>UTC | $RV_1$<br>[km s <sup>-1</sup> ] | $\Delta RV_1$<br>[km s <sup>-1</sup> ] | $RV_2$<br>[km s <sup>-1</sup> ] | $\Delta RV_2$<br>[km s <sup>-1</sup> ] | Instrument |
|--------------------|---------------------------------|----------------------------------------|---------------------------------|----------------------------------------|------------|
| 10426.711986       | 60.03                           | 9.14                                   | 41.66                           | 9.22                                   | IDS        |
| 10426.730069       | 55.33                           | 4.57                                   | 54.96                           | 3.95                                   | IDS        |
| 10427.568303       | 22.90                           | 13.36                                  | 98.97                           | 12.29                                  | IDS        |
| 10427.586293       | 38.01                           | 10.43                                  | 82.12                           | 10.65                                  | IDS        |
| 10427.604333       | 52.56                           | 13.10                                  | 63.98                           | 7.18                                   | IDS        |
| 10427.640501       | 78.96                           | 10.17                                  | 37.00                           | 5.90                                   | IDS        |
| 10427.658595       | 80.16                           | 9.54                                   | 2.07                            | 10.28                                  | IDS        |
| 10427.677213       | 111.05                          | 6.78                                   | -2.50                           | 9.76                                   | IDS        |
| 10427.695279       | 119.40                          | 9.22                                   | -15.23                          | 5.24                                   | IDS        |
| 10427.713363       | 129.54                          | 14.44                                  | -16.45                          | 9.41                                   | IDS        |
| 10435.613760       | 56.04                           | 4.41                                   | 55.55                           | 3.10                                   | FIES       |
| 10451.692321       | 5.16                            | 4.73                                   | 83.75                           | 7.77                                   | FIES       |
| 10451.710229       | -3.64                           | 4.86                                   | 117.82                          | 3.49                                   | FIES       |
| 10462.684526       | 126.24                          | 5.78                                   | -20.07                          | 5.89                                   | ALFOSC     |
| 10463.515200       | 57.13                           | 6.48                                   | 60.23                           | 3.75                                   | ALFOSC     |
| 10463.522815       | 53.00                           | 8.06                                   | 57.95                           | 5.32                                   | ALFOSC     |
| 10463.530392       | 42.85                           | 7.76                                   | 82.97                           | 8.49                                   | ALFOSC     |
| 10463.613866       | -30.69                          | 6.79                                   | 150.23                          | 15.31                                  | ALFOSC     |
| 10471.660727       | 142.69                          | 1.09                                   | -44.14                          | 0.80                                   | UVES       |
| 10471.669856       | 145.29                          | 0.81                                   | -44.88                          | 0.94                                   | UVES       |
| 10471.678957       | 143.42                          | 1.04                                   | -40.03                          | 0.71                                   | UVES       |
| 10471.688045       | 141.58                          | 1.02                                   | -37.81                          | 0.75                                   | UVES       |
| 10471.697140       | 136.39                          | 1.12                                   | -32.99                          | 0.98                                   | UVES       |
| 10471.706232       | 135.55                          | 0.93                                   | -26.67                          | 0.93                                   | UVES       |
| 10471.715322       | 129.76                          | 1.02                                   | -24.49                          | 0.93                                   | UVES       |
| 10471.724414       | 122.58                          | 1.17                                   | -16.54                          | 0.89                                   | UVES       |
| 10471.733505       | 117.61                          | 1.09                                   | -14.89                          | 0.85                                   | UVES       |
| 10471.742600       | 106.43                          | 1.07                                   | -4.46                           | 0.97                                   | UVES       |
| 10471.751691       | 104.14                          | 1.27                                   | 3.99                            | 0.94                                   | UVES       |
| 10471.760789       | 94.76                           | 1.39                                   | 12.92                           | 0.94                                   | UVES       |
| 10471.769880       | 84.35                           | 1.31                                   | 18.86                           | 0.92                                   | UVES       |
| 10471.778969       | 79.40                           | 2.45                                   | 30.92                           | 2.07                                   | UVES       |
| 10471.788065       | 67.00                           | 4.46                                   | 40.27                           | 6.17                                   | UVES       |
| 10471.797156       | 62.90                           | 3.46                                   | 48.17                           | 1.98                                   | UVES       |
| 10471.806251       | 56.81                           | 11.41                                  | 56.94                           | 16.47                                  | UVES       |
| 10471.815355       | 48.61                           | 7.41                                   | 60.71                           | 9.05                                   | UVES       |
| 10471.824448       | 37.51                           | 8.51                                   | 72.91                           | 6.31                                   | UVES       |
| 10471.833536       | 27.02                           | 1.78                                   | 80.67                           | 2.15                                   | UVES       |
| 10525.451278       | 60.95                           | 5.62                                   | 60.27                           | 3.17                                   | FIES       |
| 10525.469185       | 57.98                           | 3.66                                   | 63.47                           | 4.66                                   | FIES       |
| 10545.435565       | -33.32                          | 6.71                                   | 131.51                          | 4.64                                   | FIES       |
